# Supplementary material for: The progression rate of spinocerebellar ataxia type 3 varies with disease stage
Source: J Transl Med. 2022 May 14;20:226. doi: 10.1186/s12967-022-03428-1 (PMC9107762; doi:10.1186/s12967-022-03428-1)
Supplement: Supplementary file 3 — Additional file 3. ICARS prediction based on expanded ATXN3 CAG repeat length and duration. [file 12967_2022_3428_MOESM3_ESM.xls]

## Sheet: Sheet1
ICARS prediction per expanded CAG repeat length and per duration. Prediction of ICARS progression rate/year at different duration stage.
Prediction equations:ICARS=(-62.620)+(-7.582)*d1+(-6.604)*d2+(-0.460)*CAGexp+0.148*dt*CAGexp.
Subject	CAGexp	Total duarion at examination (dt)	Early/Late duration stage	d1	d2	Predicted ICARS scores	five years progression at early/late duration stage	Progression/year
1	60	5	Early	-8	0	14.836
1	60	10	Early	-3	0	21.326	6.49	1.298
1	60	15	Late	0	2	29.772
1	60	20	Late	0	7	41.152	11.38	2.276
2	65	5	Early	-8	0	16.236
2	65	10	Early	-3	0	26.426	10.19	2.038
2	65	15	Late	0	2	38.572
2	65	20	Late	0	7	53.652	15.08	3.016
3	70	5	Early	-8	0	17.636
3	70	10	Early	-3	0	31.526	13.89	2.778
3	70	15	Late	0	2	47.372
3	70	20	Late	0	7	66.152	18.78	3.756
4	75	5	Early	-8	0	19.036
4	75	10	Early	-3	0	36.626	17.59	3.518
4	75	15	Late	0	2	56.172
4	75	20	Late	0	7	78.652	22.48	4.496
5	80	5	Early	-8	0	20.436
5	80	10	Early	-3	0	41.726	21.29	4.258
5	80	15	Late	0	2	64.972
5	80	20	Late	0	7	91.152	26.18	5.236
Other interpreting information in this table was similar to that in Additional file 1 and Additional file 2.
